# Supplementary material
Source: PubMed Central journal article supplement (PMC5498243)
Supplement: NIHMS855563-supplement-supplement_1.pdf [file NIHMS855563-supplement-supplement_1.pdf]

Supplemental Table 1. Eligibility Screening Criteria by Recruitment Site (N=373)

|                                   | Flyers | Community<br>Registry | Clinical<br>Registry | Total |
|-----------------------------------|--------|-----------------------|----------------------|-------|
| Screened for eligibility          | 39     | 170                   | 164                  | 373   |
| Ineligible                        | 14     | 79                    | 108                  | 201   |
| Insufficient computer time        | 4      | 1                     | 11                   | 16    |
| Visited Your Disease Risk website | 1      | 4                     | 8                    | 13    |
| Visited Susan G. Komen website    | 2      | 3                     | 19                   | 24    |
| Age                               | 1      | 0                     | 0                    | 1     |
| Race/ethnicity                    | 0      | 1                     | 0                    | 1     |
| Prior cancer diagnosis            | 1      | 3                     | 22                   | 26    |
| Prior biopsy                      | 5      | 63                    | 48                   | 116   |
| Multiple reasons                  | 0      | 4                     | 0                    | 4     |
| Refused                           | 2      | 5                     | 0                    | 7     |
| Enrolled                          | 23     | 86                    | 56                   | 165   |

Supplemental Table 2. Personal characteristics of the 373 individuals screened for eligibility

| Characteristic               | Flyers (%) | Clinical Registry (%) | Community Registry (%) | p     |
|------------------------------|------------|-----------------------|------------------------|-------|
| Age (mean years)             | 53.4       | 59.3                  | 54.4                   | .001  |
| Bachelor's degree            | 9.3        | 65.6                  | 25.2                   | .0001 |
| Non-Hispanic White           | 5.3        | 50.0                  | 44.7                   | .0001 |
| Prior cancer diagnosis       | 7.7        | 21.5                  | 2.9                    | .0001 |
| Prior biopsy                 | 23.1       | 58.4                  | 41.8                   | .0001 |
| Visited YDR or Komen website | 7.7        | 18.3                  | 7.1                    | .005  |
| Insufficient computer time   | 10.3       | 7.6                   | 0.6                    | .002  |
| Eligible                     | 61.5       | 34.1                  | 50.0                   | .001  |

Supplemental Table 3. Intercorrelations, means, and standard deviations for social-cognitive variables (N=122)<sup>a</sup>

|                                    | 1      | 2     | 3      | 4      | 5    |
|------------------------------------|--------|-------|--------|--------|------|
| 1 Pre-intervention perceived risk  | 1      | -     | -      | -      | -    |
| 2 Post-intervention perceived risk | 0.60** | 1     | -      | -      | -    |
| 3 Self-efficacy                    | -0.11  | -0.14 | 1      | -      | -    |
| 4 Response-efficacy                | -0.16  | -0.11 | 0.18   | 1      | -    |
| 5 Intentions                       | -0.16  | -0.13 | 0.79** | 0.28** | 1    |
| Mean (M)                           | 3.94   | 3.93  | 3.35   | 3.60   | 4.07 |
| Standard deviation (SD)            | 1.11   | 1.14  | 1.20   | 0.86   | 1.03 |

<sup>a</sup> Pearson correlations based on listwise deletion. \*  $p < .05$ , \*\*  $p < .01$  The response scales for the perceived risk variables had 7 points excluding the “don’t know” response option, which was treated as missing for all analyses. The response scales for self-efficacy, response-efficacy, and intentions had 5 points.
